# Supplementary material
Source: HighWire-hosted journal article supplement (https://ajnr-sso.highwirestaging.com/highwire/filestream/96731/field_highwire_adjunct_files/0/1051.pdf)
Supplement: 1051.pdf [file 1051.pdf]

## Supplementary Tables

| Device                                                                 | Number of wires           | Wire size          | Composition                                         | Size                                     | Delivery catheter |
|------------------------------------------------------------------------|---------------------------|--------------------|-----------------------------------------------------|------------------------------------------|-------------------|
| Pipeline Shield<br>(Medtronic;<br>Dublin, Ireland)                     | 48                        | ~ 30 $\mu\text{m}$ | Cobalt-chromium<br>Platinum-tungsten for visibility | Diameter 2.5-5 mm<br>Length 10-35 mm     | 0.027"            |
| Surpass Evolve<br>(Stryker Neurovascular;<br>Fremont, California, USA) | 64<br>(48 for the 2.5 mm) | ~ 28 $\mu\text{m}$ | Cobalt-chromium<br>Platinum-tungsten for visibility | Diameter 2.5-5 mm<br>Length 12-40 mm     | 0.027"            |
| Silk Vista Baby<br>(Balt Extrusion;<br>Montmorency, France)            | 48                        | -                  | Nitinol<br>Platinum for visibility                  | Diameter 2.25-3.25 mm<br>Length 10-25 mm | 0.017"            |

**Supplementary Table 1:** Main technical characteristics of flow diverters that were used and evaluated in this study

|                        | 3D-TOF with HyperSense | LAVA-Flex                      | TRICKS     | Delayed CE-MRA |
|------------------------|------------------------|--------------------------------|------------|----------------|
| TR (ms)                | 19                     | 3.9                            | 3          | 9.4            |
| TE (ms)                | 3.4                    | 2,2 (InPhase) / 1,1 (OutPhase) | 1.3        | 3.8            |
| Flip angle             | 15°                    | 9°                             | 20°        | 10°            |
| Total acquisition time | 2 min 59 s             | 1 min 57 s                     | 1 min 08 s | 3 min 07 s     |
| Number of sections     | 176                    | 184                            | 60         | 300            |
| Section thickness (mm) | 0.5                    | 0.5                            | 1.3        | 0.6            |
| Matrix                 | 400 x 300              | 180 x 256                      | 224 x 192  | 320 x 320      |
| Field of view (mm)     | 310 x 220              | 367 x 260                      | 361 x 256  | 367 x 260      |
| Bandwidth (kHz)        | 41.7                   | 142.9                          | 125.0      | 31.2           |
| NEX                    | 0.84                   | 2.79                           | 0.5        | 1              |

**Supplementary Table 2:** Scan parameters of NC-MRA sequences and CE-MRA sequences used in this study

### Supplementary Figure

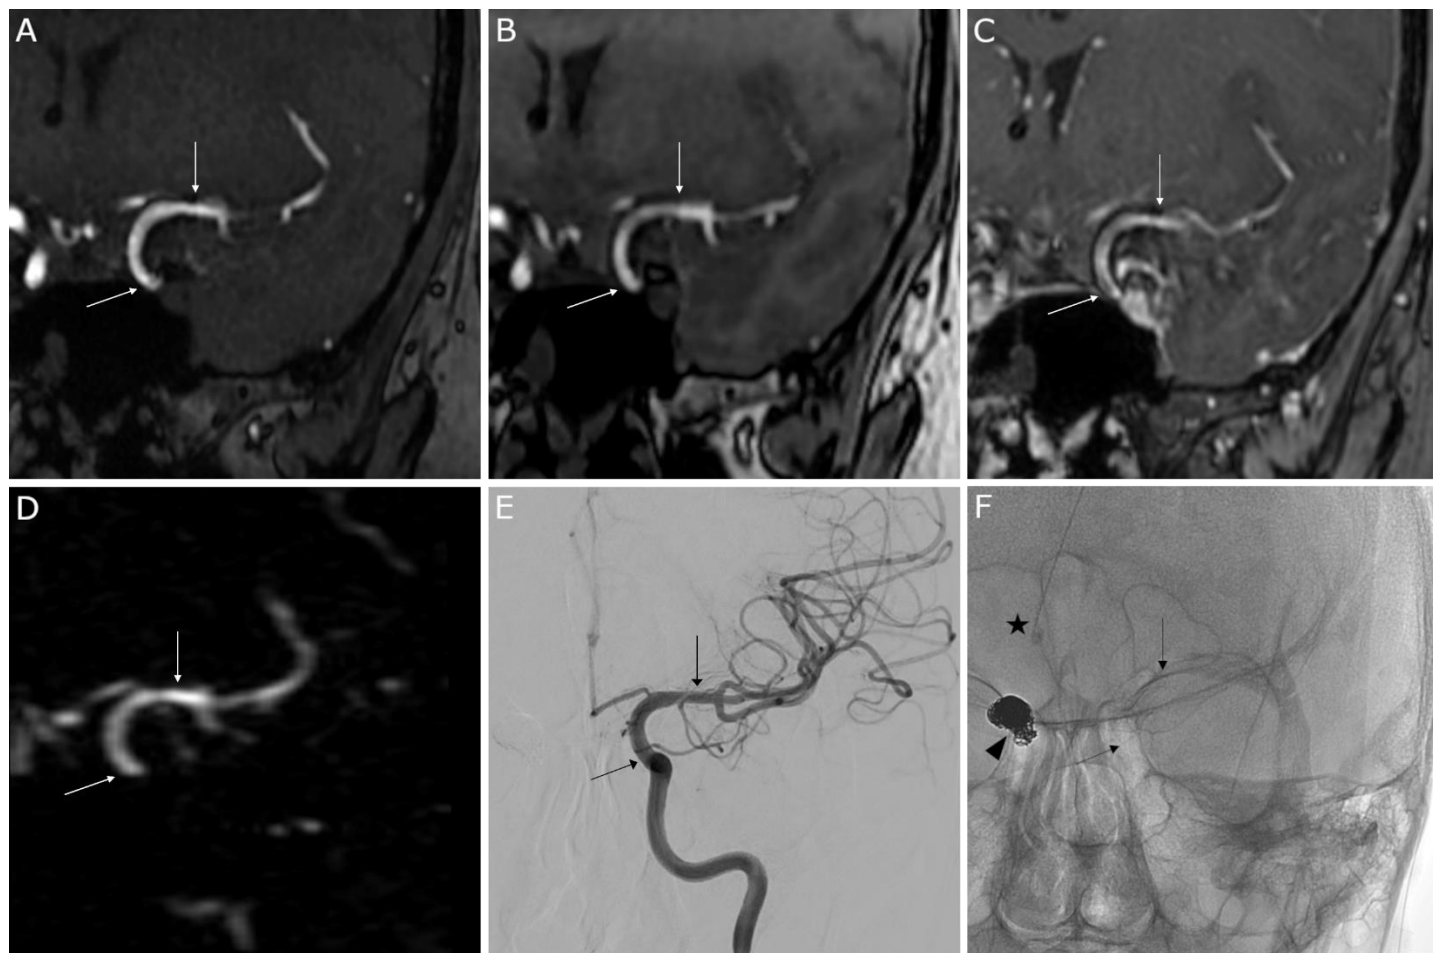

**Supplementary Figure 1.** 41-year-old woman treated for an unruptured posterior communicating artery aneurysm with a 4 x 14 Pipeline Shield FD placed between the left ICA and the left middle cerebral artery. A-B, NC-MRA showing no in-stent stenosis on either 3D-TOF with HyperSense (A) or LAVA-Flex (B). C-D, CE-MRA showing no in-stent stenosis, on either delayed CE-MRA (C) or TRICKS-MRA (D). E, DSA confirming the absence of in-stent stenosis. F, Unsubtracted angiography before injection of contrast media showing the flow diverter, a ventricular catheter (black star), and coils within a large right posterior communicating aneurysm embolized 2 years earlier, revealed by a subarachnoid hemorrhage. Black and white arrows show the proximal and distal ends of the flow diverter on each panel.
